# Supplementary material
Source: PubMed Central journal article supplement (PMC3315124)

**Supplementary figures for**

**Voltage-activated calcium channel ( $Ca_v$ ) expression profiles in mouse brain  
and cultured hippocampal neurons**

Bettina Schlick, Bernhard E. Flucher, and Gerald J. Obermair

**Suppl. Fig. 1.** Average expression stability of reference genes in all used brain tissue and culture preparations: The genes are ranked according to increasing variation of their expression in different preparations, beginning with the two most stable genes at the top. Both, HPRT1 and SDHA were determined to be most stably expressed reference genes throughout preparations.

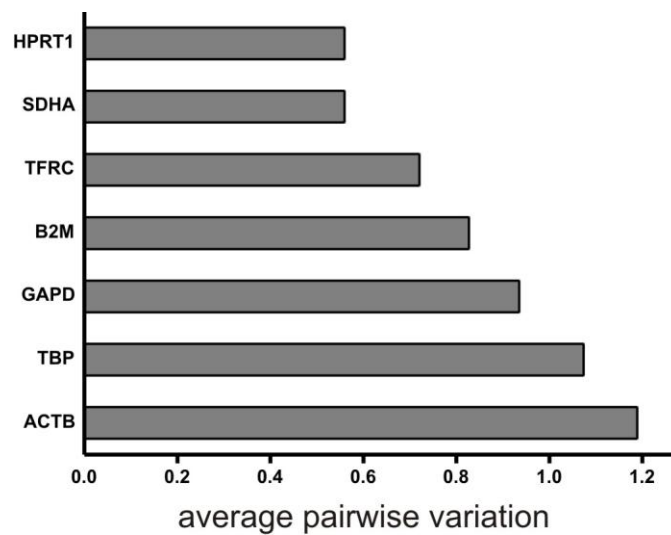

**Suppl. Fig. 2.** Expression profile of Ca<sub>v</sub> subunits in cultured hippocampal neurons after chronic NMDA-receptor blockage. Neurons were treated with 100 μM DL-APV on DIVs 18, 20, and 22 and harvested on DIV 24. qRT-PCR was performed on mRNA equivalents derived from treated and untreated (ctrl) preparations. Data are plotted as mean molecule numbers of 2 independent preparations plus the standard error of the mean. Absolute values were normalized to the SDHA reference gene.

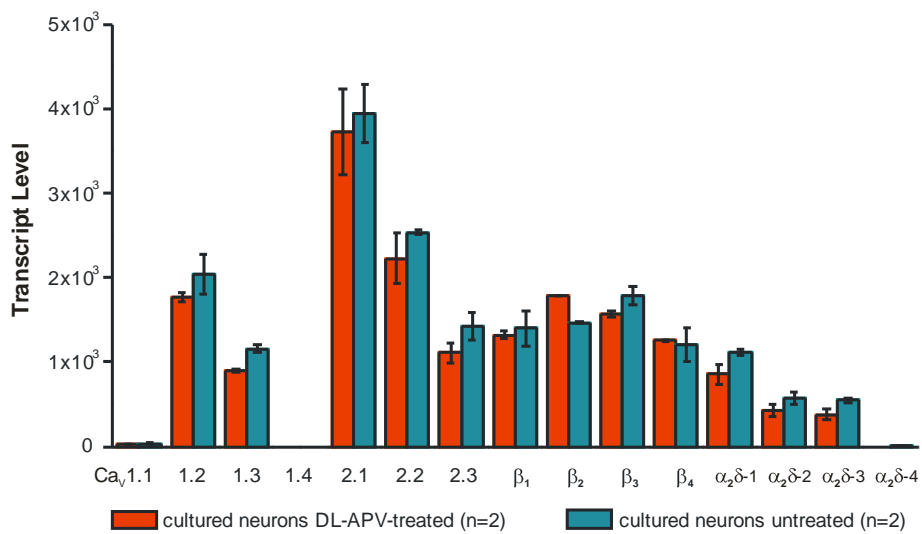

Supplement: NIHMS47459-supplement-01.pdf [file NIHMS47459-supplement-01.pdf]
